# Supplementary material for: Different murine-derived feeder cells alter the definitive endoderm differentiation of human induced pluripotent stem cells
Source: PLoS One. 2018 Jul 26;13(7):e0201239. doi: 10.1371/journal.pone.0201239 (PMC6062072; doi:10.1371/journal.pone.0201239)
Supplement: S1 Table — (XLSX) [file pone.0201239.s003.xlsx]

## Sheet: Sheet1
Target gene (symbol)	Sequences (Forward (F), Reverse (R); 5' to 3')
Kruppel-like factor 4 (KLF4)	F: GAGTTCCCATCTCAAGGCAC R: CCCCGTGTGTTTACGGTAGT
Kruppel-like factor 5 (KLF5)	F: AAGGAGTAACCCCGATTTGG R: CAGCCTTCCCAGGTACACTT
Octamer-binding transcription factor 3/4 (OCT3/4)	F: CTTGAATCCCGAATGGAAAGGG R: GTGTATATCCCAGGGTGATCCTC
Sex determining region Y-box 2 (SOX2)	F: GGCAGCTACAGCATGATGATGCAGGAGC R: CTGGTCATGGAGTTGTACTGCAGG
Nanog homeobox (NANOG)	F: AGAAGGCCTCAGCACCTAC R: GGCCTGATTGTTCCAGGATT
Undifferentiated embryonic cell transcription factor 1 (UTF1)	F: GGCTCCCAGCGAACCAG R: GTCCGCAGACTTCGGTG
Growth factor receptor bound protein 7 (GRB7)	F: GAACGGGTGTCCTGCTACTC R: GAGGTGGAGACAGATCCAGC
Nodal growth differentiation factor (NODAL)	F: AGACATCATCCGCAGCCTAC R: ATGCCAGATCCTCTTGTTGG
Left-right determination factor 1 (LEFTY1)	F: GGAAAGAGGTTCAGCCAGAG R: CTCCATGCCGAACACCAG
Left-right determination factor 2 (LEFTY2)	F: CTGGACCTCAGGGACTATGG R: TCAATGTACATCTCCTGGCG
Forkhead box A2 (FOXA2)	F: GCGACCCCAAGACCTACAG R: GGTTCTGCCGGTAGAAGGG
Sex determining region Y-box 17 (SOX17)	F: GTGGACCGCACGGAATTTG R: GAGGCCCATCTCAGGCTTG
Human X inactive specific transcript exons 1-3 (hXIST ex1-3)	F: TTGCCCTACTAGCTCCTCGGAC R: TTCTCCAGATAGCTGGCAACC
Human X inactive specific transcript exon 4 (hXIST ex4)	F: ATTCCCTTTGACGATCCCTA R: GGGTTGTTGCCCAGTGGTAG
Human X inactive specific transcript exons 5-6 (hXIST ex5-6)	F: CTACAAGCAGTGCAGAGAGC R: CTAAGACAAGACACAGACCAC
Glyceraldehyde 3-phosphate dehydrogenase (GAPDH)	F: CGAGATCCCTCCAAAATCAA R: CATGAGTCCTTCCACGATACCAA
